# Supplementary material
Source: PubMed Central journal article supplement (PMC9066279)
Supplement: jama-e224712-s003.pdf [file jama-e224712-s003.pdf]

## Supplemental Online Content

Tucker KL, Mort S, Yu LM, et al; for the BUMP Investigators. Effect of self-monitoring of blood pressure on diagnosis of hypertension during higher-risk pregnancy. *JAMA*. Published May 3, 2022. doi:10.1001/jama.2022.4712

### **Supplement 3.** Supplemental Tables and Figures

**eTable 1.** Secondary Outcomes

**eTable 2.** Primary outcome sensitivity analyses

**eTable 3.** Subgroup analysis

**eTable 4.** Additional maternal outcomes

**eTable 5.** Additional perinatal outcomes

**eTable 6.** Summary statistics of the STAI-6 short form anxiety questionnaire and the adjusted mean difference between the randomised groups

**eTable 7.** Summary statistics for the adapted brief illness perception questionnaire

**eTable 8.** Summary of maternal health-related quality of life measured using EQ-5D-5L instrument

**eFigure 1.** Forest plot for the subgroup analysis for the raised blood pressure (hurdle effect) outcome

**eFigure 2.** Forest plot for the subgroup analysis for the time to a raised blood pressure (difference in days, conditional on having a raised blood pressure) outcome

**eFigure 3.** Blood Pressure Interpretation Chart

This supplemental material has been provided by the authors to give readers additional information about their work.

**eTable 1 Secondary Outcomes**

|                                                                                                                                                                        |
|------------------------------------------------------------------------------------------------------------------------------------------------------------------------|
| <b>Maternal</b>                                                                                                                                                        |
| • Severe hypertension (systolic BP $\geq 160$ mmHg and/or or diastolic BP $\geq 110$ mmHg)                                                                             |
| • Serious maternal complications (pre- eclampsia, placental abruption, transient ischemic attack or stroke, pulmonary oedema, renal failure, blood transfusion), death |
| • Onset of labour                                                                                                                                                      |
| • Quality of life: EQ-5D-5L                                                                                                                                            |
| <b>Perinatal</b>                                                                                                                                                       |
| • Stillbirth                                                                                                                                                           |
| • Early neonatal deaths                                                                                                                                                |
| • Gestation at delivery                                                                                                                                                |
| • Mode of delivery                                                                                                                                                     |
| • Birth weight including centile                                                                                                                                       |
| • Small for gestational age infants (<10th and <3 <sup>rd</sup> centile)                                                                                               |
| • Neonatal unit admissions including length of stay                                                                                                                    |
| <b>Process</b>                                                                                                                                                         |
| • Health Behaviours (Illness perception questionnaire)                                                                                                                 |
| • Fidelity to monitoring schedule                                                                                                                                      |
| • STAI-6 short form anxiety questionnaire                                                                                                                              |
| • Health service costs: outpatient consultations (primary & secondary care), inpatient stays, type and dose of antihypertensive medication. <sup>a</sup>               |
| • Cost per quality-adjusted life year gained over trial period. <sup>a</sup>                                                                                           |

<sup>a</sup>To be reported separately

**eTable 2 Primary outcome sensitivity analyses**

|                                                                   | <b>Self-Monitoring</b> | <b>Usual Care</b> | <b>Mean difference in days</b> | <b>P value</b> |
|-------------------------------------------------------------------|------------------------|-------------------|--------------------------------|----------------|
| <b>Adjusting for baseline covariates that predict missingness</b> | <b>n=1171</b>          | <b>n=1175</b>     |                                |                |
| Raised blood pressure                                             | 179 (15.3%)            | 184 (15.7%)       | --                             |                |
| Mean time to raised blood pressure (days) <sup>a</sup>            | 104.3 (32.61)          | 106.2 (31.98)     | -1.52 [-8.06 to 5.02]          | 0.65           |
| Median (IQR)                                                      | 109 (90 to 127)        | 115 (90 to 129)   |                                |                |
| <b>Multiple imputation</b>                                        |                        |                   | -1.59 [-8.15 to 4.97]          | 0.64           |
| <b>Using only blood pressure values in primary outcome</b>        | <b>n=1171</b>          | <b>n=1175</b>     |                                |                |
| Raised blood pressure                                             | 168 (14.4%)            | 169 (14.4%)       |                                |                |
| Time to raised blood pressure (days) <sup>a</sup>                 |                        |                   |                                |                |
| Mean (SD)                                                         | 106.3 (32.41)          | 106.3 (30.59)     | -0.05 [-6.65 to 6.55]          | 0.99           |
| Median (IQR)                                                      | 112.5 (94 to 128)      | 114.0 (90 to 128) |                                |                |
| [Range]                                                           | [2 to 159]             | [14 to 153]       |                                |                |

<sup>a</sup> Conditional on having been diagnosed with raised blood pressure

**eTable 3 Subgroup analysis**

| Subgroup                                                              | N    | Treatment effect<br>[95% CI]* | Test of<br>Interaction |
|-----------------------------------------------------------------------|------|-------------------------------|------------------------|
| <b>Eligible for aspirin at baseline</b>                               |      |                               |                        |
| <b>Raised blood pressure (Hurdle effect)</b>                          |      |                               | 0.36                   |
| Eligible                                                              | 1146 | -0.06 [-0.22 to 0.10]         |                        |
| Ineligible                                                            | 1200 | 0.06 [-0.14 to 0.26]          |                        |
| <b>Time to raised blood pressure (Difference in days)<sup>a</sup></b> |      |                               | 0.34                   |
| Eligible                                                              | 251  | -0.13 [-8.04 to 7.78]         |                        |
| Ineligible                                                            | 112  | -5.74 [-17.58 to 6.09]        |                        |
| <b>Gestational age at recruitment</b>                                 |      |                               |                        |
| <b>Raised blood pressure (Hurdle effect)</b>                          |      |                               | 0.78                   |
| ≤20 weeks                                                             | 799  | 0.00 [-0.21 to 0.22]          |                        |
| >20 weeks                                                             | 1547 | -0.03 [-0.19 to 0.12]         |                        |
| <b>Time to raised blood pressure (Difference in days)<sup>a</sup></b> |      |                               | 0.36                   |
| ≤20 weeks                                                             | 124  | 2.48 [-8.57 to 13.52]         |                        |
| >20 weeks                                                             | 239  | -3.51 [-11.43 to 4.41]        |                        |
| <b>Parity</b>                                                         |      |                               |                        |
| <b>Raised blood pressure (Hurdle effect)</b>                          |      |                               | 0.86                   |
| 0                                                                     | 1419 | -0.03 [-0.20 to 0.14]         |                        |
| ≥1                                                                    | 927  | -0.01 [-0.20 to 0.18]         |                        |
| <b>Time to raised blood pressure (Difference in days)<sup>a</sup></b> |      |                               | 0.62                   |
| 0                                                                     | 190  | 0.01 [-9.05 to 9.08]          |                        |
| ≥1                                                                    | 173  | -3.31 [-12.78 to 6.15]        |                        |
| <b>Self-monitoring blood pressure prior to randomisation</b>          |      |                               |                        |

|                                                                       |      |                        |      |
|-----------------------------------------------------------------------|------|------------------------|------|
| <b>Raised blood pressure (Hurdle effect)</b>                          |      |                        | 0.83 |
| Yes                                                                   | 606  | -0.03 [-0.26 to 0.20]  |      |
| No                                                                    | 1720 | 0.00 [-0.15 to 0.15]   |      |
| <b>Time to raised blood pressure (Difference in days)<sup>a</sup></b> |      |                        | 0.90 |
| Yes                                                                   | 127  | -2.17 [-13.28 to 8.94] |      |
| No                                                                    | 235  | -1.30 [-9.54 to 6.85]  |      |
| <b>Deprivation score</b>                                              |      |                        |      |
| <b>Raised blood pressure (Hurdle effect)</b>                          |      |                        | 0.03 |
| ≤Median                                                               | 1170 | 0.11 [-0.07 to 0.28]   |      |
| >Median                                                               | 1161 | -0.17 [-0.35 to 0.01]  |      |
| <b>Time to raised blood pressure (Difference in days)<sup>a</sup></b> |      |                        | 0.66 |
| ≤Median                                                               | 198  | -2.99 [-11.84 to 5.87] |      |
| >Median                                                               | 163  | 0.04 [-9.88 to 9.95]   |      |
| <b>Ethnicity</b>                                                      |      |                        |      |
| <b>Raised blood pressure (Hurdle effect)</b>                          |      |                        | 0.68 |
| White British or White Irish                                          | 1746 | 0.00 [-0.15 to 0.14]   |      |
| Asian/Asian British, Black/Black British, Chinese, Mixed, or Other    | 584  | -0.06 [-0.31 to 0.19]  |      |
| <b>Time to raised blood pressure (Difference in days)<sup>a</sup></b> |      |                        | 0.03 |
| White British or White Irish                                          | 270  | -5.98 [-13.51 to 1.55] |      |
| Asian/Asian British, Black/Black British, Chinese, Mixed, or Other    | 93   | 11.07 [-1.83 to 23.98] |      |
| <b>Educational Qualifications</b>                                     |      |                        |      |
| <b>Raised blood pressure (Hurdle effect)</b>                          |      |                        |      |
| Post graduate or above                                                | 694  | -0.10 [-0.34 to 0.14]  |      |
| First degree or professional qualifications                           | 884  | -0.03 [-0.24 to 0.18]  | 0.67 |

|                                                                                                     |     |                        |      |
|-----------------------------------------------------------------------------------------------------|-----|------------------------|------|
| A-level or equivalent, GCSE, O-Level or CSE, vocational qualifications, or no formal qualifications | 745 | 0.05 [-0.16 to 0.26]   | 0.36 |
| <b>Time to a raised blood pressure (Difference in days)<sup>a</sup></b>                             |     |                        |      |
| Post graduate or above                                                                              | 93  | -8.27 [-21.09 to 4.54] |      |
| First degree or professional qualifications                                                         | 124 | 0.89 [-9.97 to 11.76]  | 0.29 |
| A-level or equivalent, GCSE, O-Level or CSE, vocational qualifications, or no formal qualifications | 146 | 0.48 [-9.52 to 10.47]  | 0.29 |

<sup>a</sup> Conditional on having been diagnosed with raised blood pressure

**eTable 4 Additional maternal outcomes**

|                                                                | <b>Self-Monitoring</b> | <b>Usual Care</b> | <b>Adjusted relative risk</b> | <b>P value</b> |
|----------------------------------------------------------------|------------------------|-------------------|-------------------------------|----------------|
| <b>Onset of labour n</b>                                       | <b>1187</b>            | <b>1181</b>       |                               |                |
| Spontaneous <sup>a</sup>                                       | 482 (40.6%)            | 493 (41.7%)       | 0.97 [0.88 to 1.07]           | 0.58           |
| Induction                                                      | 421 (35.5%)            | 393 (33.3%)       |                               |                |
| Rupture of membranes/Stimulation of labour                     | 24 (2.0%)              | 31 (2.6%)         |                               |                |
| Pre-labour caesarean section                                   | 260 (21.9%)            | 264 (22.4%)       |                               |                |
|                                                                |                        |                   |                               |                |
| <b>Indication for induction of labour or pre-labour CS*. n</b> | <b>705</b>             | <b>688</b>        |                               |                |
| Hypertension-related complication                              | 92 (13.1%)             | 84 (12.2%)        |                               |                |
| Other maternal medical complication                            | 139 (19.7%)            | 126 (18.3%)       |                               |                |
| Fetal compromise (on scan or cardiotocography)                 | 143 (20.3%)            | 148 (21.5%)       |                               |                |
| Breech presentation                                            | 28 (4.0%)              | 26 (3.8%)         |                               |                |
| Twins                                                          | 26 (3.7%)              | 25 (3.6%)         |                               |                |
| Other fetal/placental complication                             | 106 (15.0%)            | 116 (16.9%)       |                               |                |
| Previous Caesarean section                                     | 62 (8.8%)              | 80 (11.6%)        |                               |                |
| Maternal request                                               | 32 (4.5%)              | 28 (4.1%)         |                               |                |
| Reaching ≥37 week's gestation                                  | 101 (14.3%)            | 83 (12.1%)        |                               |                |
| Other/Missing                                                  | 12 (1.7%)              | 7 (1.0%)          |                               |                |

<sup>a</sup>Self-monitoring versus usual care. Log-Poisson generalised linear mixed effects model with robust standard errors of the proportion of women with spontaneous onset of labour modelled against randomised arm, and parity as fixed effects; and site as a random effect. Level of significance = 0.05

**eTable 5 Additional perinatal outcomes**

| <b>Outcome</b>                                                 | <b>Self-Monitoring</b> | <b>Usual Care</b> | <b>Adjusted effect measure<br/>(95% CI)</b> | <b>P value</b> |
|----------------------------------------------------------------|------------------------|-------------------|---------------------------------------------|----------------|
|                                                                | <b>n=1249</b>          | <b>n=1235</b>     |                                             |                |
| Birthweight grams                                              | 3247.4 (675.29)        | 3264.1 (640.86)   |                                             |                |
| Birthweight centile                                            | 57.2 (30.32)           | 57.5 (30.51)      |                                             |                |
|                                                                |                        |                   |                                             |                |
| Length of neonatal unit stay (for those admitted) <sup>a</sup> | <b>n=158</b>           | <b>n=161</b>      |                                             |                |
|                                                                | 15.3 (21.20)           | 13.1 (19.08)      | 0.00 [-0.85 to 0.85]                        | 1.00           |
|                                                                |                        |                   |                                             |                |
| <b>Mode of delivery n</b>                                      | <b>n=1259</b>          | <b>n=1244</b>     |                                             |                |
| Spontaneous vaginal delivery                                   | 550 (43.7%)            | 527 (42.4%)       |                                             |                |
| Assisted vaginal delivery                                      | 229 (18.1%)            | 210 (16.9%)       |                                             |                |
| Emergency pre-labour caesarean section                         | 97 (7.7%)              | 100 (8.0%)        |                                             |                |
| Emergency caesarean section in labour                          | 153 (12.2%)            | 178 (14.3%)       |                                             |                |
| Elective pre-labour caesarean section                          | 230 (18.3%)            | 229 (18.4%)       |                                             |                |
|                                                                |                        |                   |                                             |                |

<sup>a</sup>NNU length of stay missing for 3 admitted babies in SM arm and 2 in UC arm.



**eTable 6: Summary statistics of the STAI-6 short form anxiety questionnaire and the adjusted mean difference between the randomised groups**

|                                 | STAI-6 at baseline <sup>b</sup> | STAI-6 at 30 weeks follow-up <sup>b</sup> | STAI-6 at postnatal follow-up <sup>b</sup> | Adjusted mean difference at 30 weeks [95% CI] <sup>a</sup> | Adjusted mean difference at postnatal follow-up [95% CI] <sup>a</sup> |
|---------------------------------|---------------------------------|-------------------------------------------|--------------------------------------------|------------------------------------------------------------|-----------------------------------------------------------------------|
| <b>Self-Monitoring (N=1220)</b> | 23.4 (18.18)<br>1203            | 25.5 (18.49)<br>884                       | 23.3 (19.93)<br>672                        | -                                                          | -                                                                     |
| <b>Usual Care (N=1217)</b>      | 23.2 (18.00)<br>1191            | 27.0 (20.11)<br>881                       | 24.6 (20.96)<br>688                        | -1.45 [-3.11 to 0.22]<br>p=0.088                           | -1.37 [-3.25 to 0.51]<br>p=0.152                                      |

<sup>a</sup> self-monitoring versus usual care. Linear mixed effects model of STAI-6 at 30 weeks and postnatal follow-up modelled against randomised arm, time point, an interaction between randomised arm and time point, parity, and baseline STAI-6 as fixed effects; site as a random effect, and a random intercept for each participant. Level of significance = 0 .05

<sup>b</sup> STAI: short form of stait-trait anxiety inventory (6 items range 6-24; scaled to be out of 100, higher is more anxious).

**eTable 7: Summary statistics for the adapted brief illness perception questionnaire**

|                                                                                             | Self-Monitoring (N=1220) |                          |                     | Usual Care (N=1217)      |                           |                           |
|---------------------------------------------------------------------------------------------|--------------------------|--------------------------|---------------------|--------------------------|---------------------------|---------------------------|
|                                                                                             | Baseline                 | 30 week follow-up        | Postnatal follow-up | Baseline                 | 30 week follow-up         | Postnatal follow-up       |
| <b>1 How confident are you that you can use a blood pressure monitor correctly? (N)</b>     | 1210                     | 881                      | 675                 | 1203                     | 882                       | 680                       |
| Mean (SD)                                                                                   | 8.5 (2.22)               | 9.4 (1.16)               | 9.6 (1.0)           | 8.5 (2.26)               | 7.2 (3.38)                | 7.1 (3.49)                |
| <b>2 How confident are you that you can accurately measure your blood pressure at home?</b> | 1211                     | 891                      | 679                 | 1207                     | 882                       | 683                       |
| Mean (SD)                                                                                   | 8.6 (2.06)               | 9.4 (1.19)               | 9.5 (1.15)          | 8.5 (2.21)               | 7.1 (3.47)                | 7.1 (3.50)                |
| <b>3 How well do you feel you understand your blood pressure?</b>                           | 1207                     | 891                      | 674                 | 1207                     | 888                       | 689                       |
| Mean (SD)                                                                                   | 7.1 (2.72)               | 8.3 (1.85)               | 8.4 (1.86)          | 7.1 (2.73)               | 6.6 (2.93)                | 6.6 (2.98)                |
| <b>4 How much control do you feel you have over your blood pressure?</b>                    | 1209                     | 887                      | 673                 | 1206                     | 887                       | 686                       |
| Mean (SD)                                                                                   | 5.9 (2.38)               | 6.4 (2.19)               | 6.6 (2.04)          | 5.9 (2.4)                | 5.6 (2.26)                | 5.8 (2.42)                |
| <b>5 How concerned are you about your blood pressure?</b>                                   | 1210                     | 890                      | 676                 | 1206                     | 890                       | 685                       |
| Mean (SD)                                                                                   | 3.8 (3.11)               | 3.0 (2.97)               | 2.1 (2.8)           | 3.8 (3.06)               | 3.5 (2.93)                | 2.3 (2.75)                |
| <b>6 How much do you think your treatment can help manage your blood pressure?</b>          | 1208                     | 866                      | 653                 | 1205                     | 872                       | 664                       |
| Mean (SD)                                                                                   | 5.8 (3.4)                | 5.7 (3.32)               | 5.8 (3.46)          | 5.7 (3.32)               | 5.2 (3.31)                | 4.9 (3.94)                |
| <b>Combined Score</b>                                                                       |                          |                          |                     |                          |                           |                           |
| Mean (SD)                                                                                   | 42.0 (8.86)              | 46.2 (6.97) <sup>a</sup> | 47.7 (6.62)         | 42.0 (8.67) <sup>b</sup> | 38.2 (11.33) <sup>a</sup> | 39.3 (12.27) <sup>b</sup> |

Combined score is sum of individual component with q5concern reversed. Maximum 60, higher reflects greater confidence in ability to manage hypertension

<sup>a</sup> and <sup>b</sup>  $p < 0.001$  for mean differences: Linear mixed effects model of adapted brief illness perception questionnaire score at 30 weeks and postnatal follow-up modelled against randomised arm, time point, an interaction between randomised arm and time point, parity, and baseline adapted brief illness perception questionnaire as fixed effects; site as a random effect, and a random intercept for each participant.

**eTable 8: Summary of maternal health-related quality of life measured using EQ-5D-5L instrument**

|                                        | Self-monitoring (n=1,220) |               | Usual care (n=1,217) |               | Mean difference (95% confidence interval) <sup>a</sup> |
|----------------------------------------|---------------------------|---------------|----------------------|---------------|--------------------------------------------------------|
|                                        | n                         | Mean (SD)     | n                    | Mean (SD)     |                                                        |
| <i>Complete cases</i>                  |                           |               |                      |               |                                                        |
| EQ-5D-5L baseline                      | 1,202                     | 0.870 (0.148) | 1,194                | 0.862 (0.148) |                                                        |
| EQ-5D-5L 30-weeks                      | 875                       | 0.783 (0.166) | 897                  | 0.767 (0.184) | 0.012 (-0.002 to 0.026)                                |
| EQ-5D-5L post delivery                 | 660                       | 0.859 (0.158) | 669                  | 0.853 (0.160) | 0.001 (-0.015 to 0.017)                                |
|                                        | n                         | Mean (SE)     | n                    | Mean (SE)     | Mean difference (95% confidence interval) <sup>a</sup> |
| <i>Multiple imputation<sup>b</sup></i> |                           |               |                      |               |                                                        |
| EQ-5D-5L baseline                      | 1,220                     | 0.869 (0.004) | 1,217                | 0.862 (0.004) |                                                        |
| EQ-5D-5L 30-weeks                      | 1,220                     | 0.780 (0.005) | 1,217                | 0.765 (0.006) | 0.012 (-0.002 to 0.026)                                |
| EQ-5D-5L post delivery                 | 1,220                     | 0.857 (0.006) | 1,217                | 0.850 (0.006) | 0.004 (-0.011 to 0.019)                                |

EQ-5D-5L: EuroQol five-level health-related quality of life instrument; SD: standard deviation;

<sup>a</sup> Adjusted for centre, parity and potential EQ-5D-5L index baseline imbalances

<sup>b</sup> missing values replaced by multiple imputation

**eFigure 1: Forest plot for the subgroup analysis for the raised blood pressure (hurdle effect) outcome**

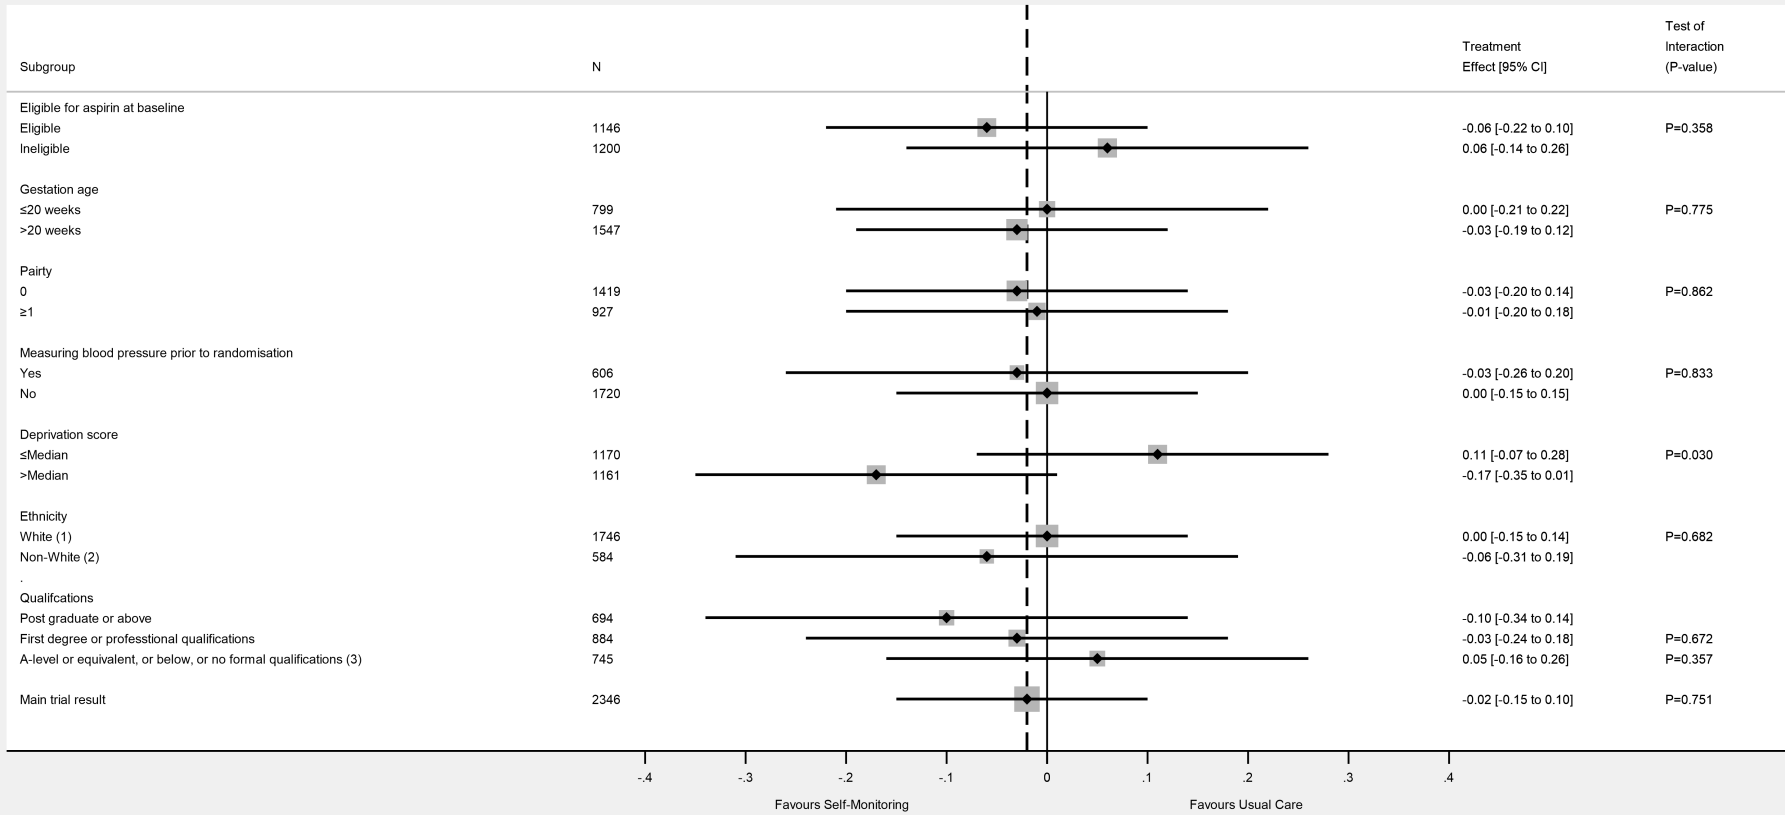

- (1) Including British, Irish, and White Other
- (2) Including Asian/Asian British, Black/Black British, Mixed, Multiple, and Other ethnic groups
- (3) Including A-level or equivalent, CGSE, O-level or CSE, vocational qualifications, or no formal qualifications

**eFigure 2 Forest plot for the subgroup analysis for the time to a raised blood pressure (difference in days, conditional on having a raised blood pressure) outcome**

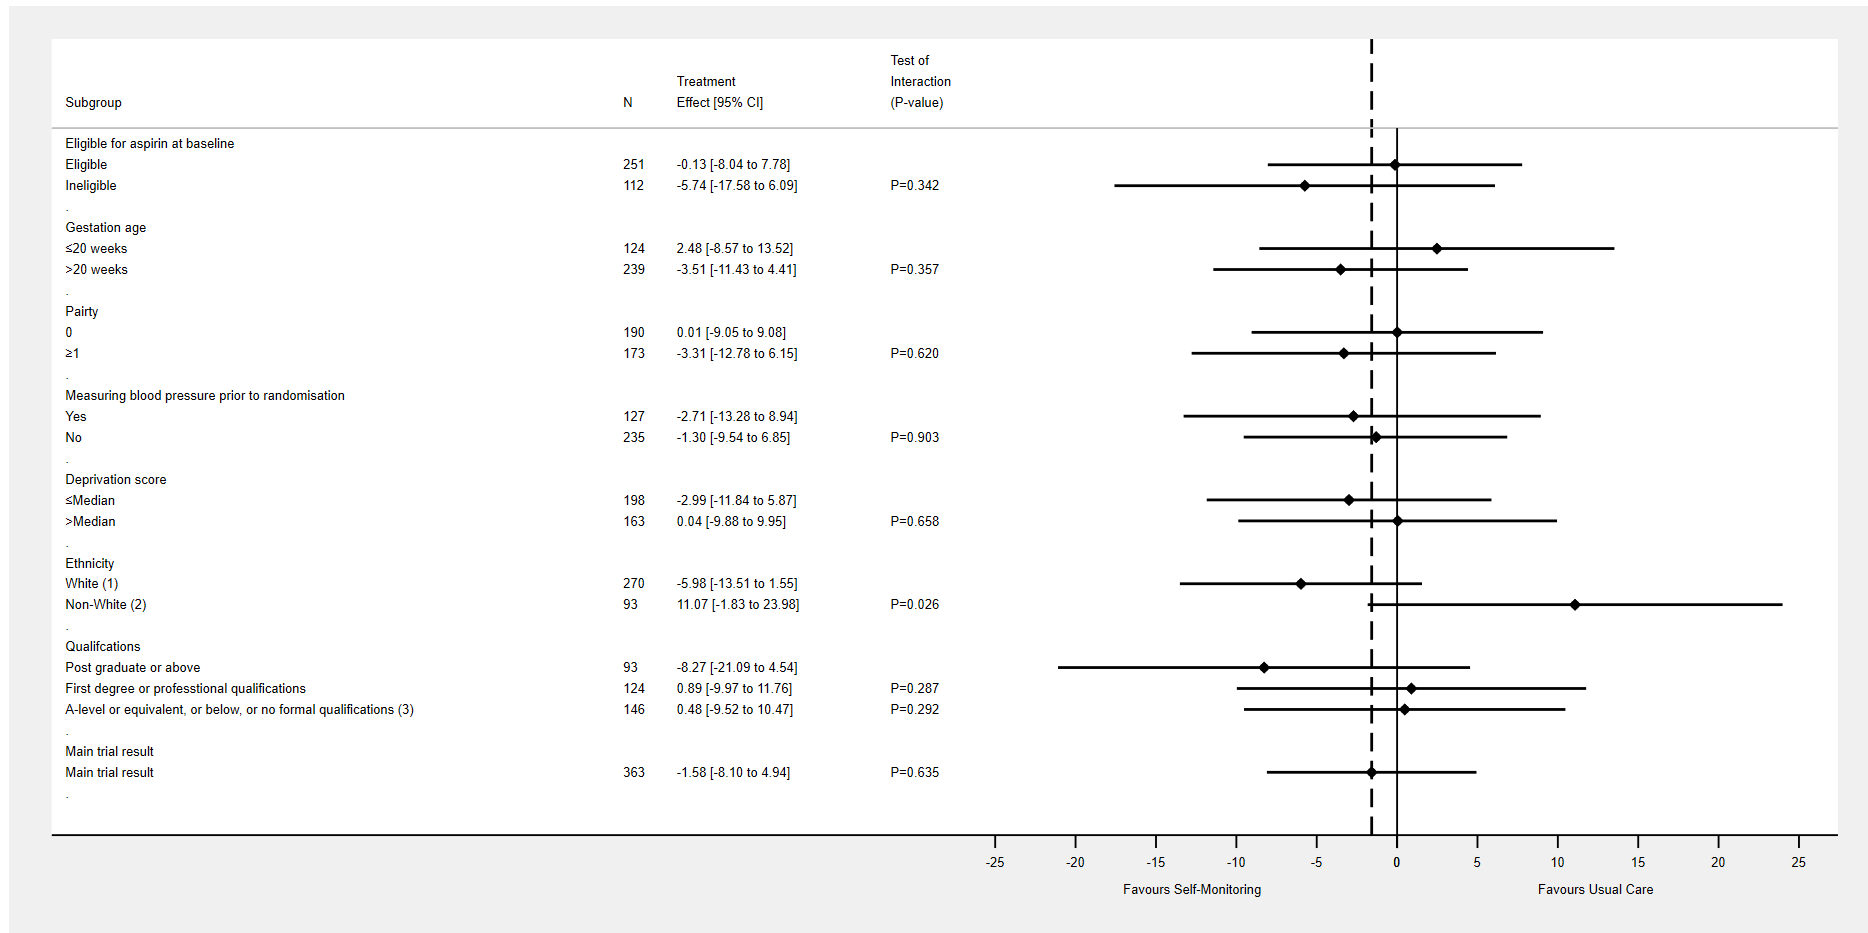

- (1) Including British, Irish, and White Other
- (2) Including Asian/Asian British, Black/Black British, Mixed, Multiple, and Other ethnic groups
- (3) Including A-level or equivalent, CGSE, O-level or CSE, vocational qualifications, or no formal qualifications

**eFigure 3: Blood Pressure Interpretation Chart**

| <b>LEVEL</b>       | <b>BLOOD PRESSURE /mmHg</b>              | <b>ACTION</b>                                                                                                                                                                                                                                                                                                                                 |
|--------------------|------------------------------------------|-----------------------------------------------------------------------------------------------------------------------------------------------------------------------------------------------------------------------------------------------------------------------------------------------------------------------------------------------|
| <b>HIGH</b>        | SYS 150 or more<br>OR<br>DIA 100 or more | Your blood pressure is high<br><br>Sit quietly for 5 minutes then measure it again and send in the reading.<br><br>Contact your maternity unit for urgent assessment today (within 4 hours) and continue to monitor your BP daily.                                                                                                            |
| <b>RAISED</b>      | SYS 140-149<br>OR<br>DIA 90-99           | Your blood pressure is raised<br><br>Sit quietly for 5 minutes then measure it again and send in the reading.<br><br>If your repeated reading is raised please contact your maternity unit within 24 hours and continue to monitor your BP daily.                                                                                             |
| <b>HIGH NORMAL</b> | SYS 135-139<br>OR<br>DIA 85-89           | Your blood pressure is normal but moving towards the raised threshold<br><br>Sit quietly for 5 minutes then measure it again and send in the reading.<br><br>If your repeat reading is still high-normal, please monitor your blood pressure daily.                                                                                           |
| <b>NORMAL</b>      | SYS 110-134<br>OR<br>DIA 70-84           | Your blood pressure is normal.<br><br>Continue blood pressure monitoring and your current care                                                                                                                                                                                                                                                |
| <b>LOW</b>         | SYS 109 or less<br>AND<br>DIA 69 or less | Your blood pressure is low. Repeat once more in 5 minutes.<br><br>If you are taking blood pressure medication, contact your maternity unit within 24 hours or within 4 hours if you feel unwell (e.g. dizzy or faint).<br><br>If you are not taking medication and you are feeling well this blood pressure does not need any further action. |
