# Supplementary material
Source: PubMed Central journal article supplement (PMC9066279)
Supplement: jama-e224712-s004.pdf [file jama-e224712-s004.pdf]

\*Indicates required information. Only first name, last name, and suffix will appear in PubMed.

| <b>*Group Name(s): The BUMP Investigators</b> |                   |                              |                  |                                                  |                                          |                                                         |                                                                                            |
|-----------------------------------------------|-------------------|------------------------------|------------------|--------------------------------------------------|------------------------------------------|---------------------------------------------------------|--------------------------------------------------------------------------------------------|
| <b>*First Name and Middle Initial(s)</b>      | <b>*Last Name</b> | <b>*Suffix (eg, Jr, III)</b> | Academic Degrees | Institution                                      | Location (city, state/province, country) | Role or Contribution, eg, chair, principal investigator | Group (if more than 1 Group listed in the byline) and/or Subgroup (eg, Steering Committee) |
| Johanna                                       | Cook              |                              |                  | University of Oxford                             | Oxford, UK                               | Trial Manager                                           | Oxford University Primary Care Clinical Trials Unit                                        |
| Maria                                         | Coates            |                              |                  | University of Oxford                             | Oxford, UK                               | Trial Administrator                                     | Oxford University Primary Care Clinical Trials Unit                                        |
| Thomas                                        | Gabriel           |                              |                  | University of Oxford                             | Oxford, UK                               | Trial Administrator                                     | Oxford University Primary Care Clinical Trials Unit                                        |
| Stephanie                                     | Brann             |                              |                  | University of Oxford                             | Oxford, UK                               | Trial Administrator                                     | Oxford University Primary Care Clinical Trials Unit                                        |
| Joris                                         | De Henau          |                              |                  | University of Oxford                             | Oxford, UK                               | Trial Administrator                                     | Oxford University Primary Care Clinical Trials Unit                                        |
| Sadie                                         | Kelly             |                              |                  | University of Oxford                             | Oxford, UK                               | Trial Data Manager                                      | Oxford University Primary Care Clinical Trials Unit                                        |
| Dave                                          | Watt              |                              |                  | University of Oxford                             | Oxford, UK                               | Trial Data Manager                                      | Oxford University Primary Care Clinical Trials Unit                                        |
| David                                         | Judge             |                              |                  | University of Oxford                             | Oxford, UK                               | Trial Data Manager                                      | Oxford University Primary Care Clinical Trials Unit                                        |
| Luis                                          | Castello          |                              |                  | University of Oxford                             | Oxford, UK                               | Trial Data Manager                                      | Oxford University Primary Care Clinical Trials Unit                                        |
| Tabitha                                       | Wishlade          |                              |                  | Oxford University Hospitals NHS Foundation Trust | Oxford, UK                               | Research midwife                                        | BUMP Investigators                                                                         |

## Supplemental Online Content: Nonauthor Collaborators

\*Indicates required information. Only first name, last name, and suffix will appear in PubMed.

| *First Name and Middle Initial(s) | *Last Name  | *Suffix (eg, Jr, III) | Academic Degrees | Institution                                      | Location (city, state/province, country) | Role or Contribution, eg, chair, principal investigator | Group (if more than 1 Group listed in the byline) and/or Subgroup (eg, Steering Committee) |
|-----------------------------------|-------------|-----------------------|------------------|--------------------------------------------------|------------------------------------------|---------------------------------------------------------|--------------------------------------------------------------------------------------------|
| Helen                             | Price       |                       |                  | Oxford University Hospitals NHS Foundation Trust | Oxford, UK                               | Research midwife                                        | BUMP Investigators                                                                         |
| Eleni                             | Fotaki      |                       |                  | Oxford University Hospitals NHS Foundation Trust | Oxford, UK                               | Research midwife                                        | BUMP Investigators                                                                         |
| Zoe                               | Vowles      |                       |                  | Guy's and St Thomas' NHS Foundation Trust        | London, UK                               | Research midwife                                        | BUMP Investigators                                                                         |
| Alice                             | Lewin       |                       |                  | Guy's and St Thomas' NHS Foundation Trust        | London, UK                               | Research midwife                                        | BUMP Investigators                                                                         |
| Hayley                            | Tarft       |                       |                  | Guy's and St Thomas' NHS Foundation Trust        | London, UK                               | Research midwife                                        | BUMP Investigators                                                                         |
| Julie                             | Wade        |                       |                  | Guy's and St Thomas' NHS Foundation Trust        | London, UK                               | Research midwife                                        | BUMP Investigators                                                                         |
| Declan                            | Symington   |                       |                  | Guy's and St Thomas' NHS Foundation Trust        | London, UK                               | Research midwife                                        | BUMP Investigators                                                                         |
| Jessamine                         | Hunt        |                       |                  | Guy's and St Thomas' NHS Foundation Trust        | London, UK                               | Research midwife                                        | BUMP Investigators                                                                         |
| Maria                             | Slaney      |                       |                  | Guy's and St Thomas' NHS Foundation Trust        | London, UK                               | Research midwife                                        | BUMP Investigators                                                                         |
| Charlotte                         | Mungeam     |                       |                  | Guy's and St Thomas' NHS Foundation Trust        | London, UK                               | Research midwife                                        | BUMP Investigators                                                                         |
| Rehan                             | Khan        |                       |                  | Barts Health NHS Trust                           | London, UK                               | Site Principle investigator                             | BUMP Investigators                                                                         |
| Amy                               | Thomas      |                       |                  | Barts Health NHS Trust                           | London, UK                               | Research midwife                                        | BUMP Investigators                                                                         |
| Tabitha                           | Newman      |                       |                  | Barts Health NHS Trust                           | London, UK                               | Research midwife                                        | BUMP Investigators                                                                         |
| Melanie                           | Gouldbourne |                       |                  | Barts Health NHS Trust                           | London, UK                               | Research assistant                                      | BUMP Investigators                                                                         |
| Alexandra                         | Keen        |                       |                  | Barts Health NHS Trust                           | London, UK                               | Research midwife                                        | BUMP Investigators                                                                         |
| Alice                             | Rossi       |                       |                  | Barts Health NHS Trust                           | London, UK                               | Research midwife                                        | BUMP Investigators                                                                         |
| Zandile                           | Maseko      |                       |                  | Barts Health NHS Trust                           | London, UK                               | Research midwife                                        | BUMP Investigators                                                                         |
| David                             | Churchill   |                       |                  | Royal Wolverhampton NHS Trust                    | Wolverhampton, UK                        | Site Principle investigator                             | BUMP Investigators                                                                         |
| Laura                             | Devison     |                       |                  | Royal Wolverhampton NHS Trust                    | Wolverhampton, UK                        | Research midwife                                        | BUMP Investigators                                                                         |

## Supplemental Online Content: Nonauthor Collaborators

\*Indicates required information. Only first name, last name, and suffix will appear in PubMed.

| *First Name and Middle Initial(s) | *Last Name    | *Suffix (eg, Jr, III) | Academic Degrees | Institution                                                                                  | Location (city, state/province, country) | Role or Contribution, eg, chair, principal investigator | Group (if more than 1 Group listed in the byline) and/or Subgroup (eg, Steering Committee) |
|-----------------------------------|---------------|-----------------------|------------------|----------------------------------------------------------------------------------------------|------------------------------------------|---------------------------------------------------------|--------------------------------------------------------------------------------------------|
| Kayleigh                          | Brooks        |                       |                  | Royal Wolverhampton NHS Trust                                                                | Wolverhampton, UK                        | Research midwife                                        | BUMP Investigators                                                                         |
| Julia                             | Icke          |                       |                  | Royal Wolverhampton NHS Trust                                                                | Wolverhampton, UK                        | Research midwife                                        | BUMP Investigators                                                                         |
| Patrick                           | Bose          |                       |                  | Royal Berkshire NHS Foundation Trust                                                         | Reading, UK                              | Site Principle investigator                             | BUMP Investigators                                                                         |
| Fidelma                           | Lee           |                       |                  | Royal Berkshire NHS Foundation Trust                                                         | Reading, UK                              | Research midwife                                        | BUMP Investigators                                                                         |
| Suzanne                           | Scanlon       |                       |                  | Royal Berkshire NHS Foundation Trust                                                         | Reading, UK                              | Research midwife                                        | BUMP Investigators                                                                         |
| Joanna                            | Girling       |                       |                  | Chelsea and Westminster Hospital NHS Foundation Trust and West Middlesex University Hospital | London, UK                               | Site Principle investigator                             | BUMP Investigators                                                                         |
| Mark                              | Johnson       |                       |                  | Chelsea and Westminster Hospital NHS Foundation Trust                                        | London, UK                               | Site Principle investigator                             | BUMP Investigators                                                                         |
| Natasha                           | Singh         |                       |                  | Chelsea and Westminster Hospital NHS Foundation Trust                                        | London, UK                               | Site Principle investigator                             | BUMP Investigators                                                                         |
| Carmela                           | Martella      |                       |                  | Chelsea and Westminster Hospital NHS Foundation Trust                                        | London, UK                               | Research midwife                                        | BUMP Investigators                                                                         |
| Christine                         | Adamson       |                       |                  | Chelsea and Westminster Hospital NHS Foundation Trust                                        | London, UK                               | Research midwife                                        | BUMP Investigators                                                                         |
| Maria                             | Sogo Buaki    |                       |                  | Chelsea and Westminster Hospital NHS Foundation Trust                                        | London, UK                               | Research midwife                                        | BUMP Investigators                                                                         |
| Nikki                             | Beadle        |                       |                  | Chelsea and Westminster Hospital NHS Foundation Trust                                        | London, UK                               | Research midwife                                        | BUMP Investigators                                                                         |
| Harriet                           | Hickey        |                       |                  | Chelsea and Westminster Hospital NHS Foundation Trust                                        | London, UK                               | Research midwife                                        | BUMP Investigators                                                                         |
| Amanda                            | Iriondo-Coysh |                       |                  | Chelsea and Westminster Hospital NHS Foundation Trust                                        | London, UK                               | Research midwife                                        | BUMP Investigators                                                                         |
| Joanna                            | Chilvers      |                       |                  | Chelsea and Westminster Hospital NHS Foundation Trust                                        | London, UK                               | Research midwife                                        | BUMP Investigators                                                                         |

Supplemental Online Content: Nonauthor Collaborators

\*Indicates required information. Only first name, last name, and suffix will appear in PubMed.

| *First Name and Middle Initial(s) | *Last Name | *Suffix (eg, Jr, III) | Academic Degrees | Institution                                           | Location (city, state/province, country) | Role or Contribution, eg, chair, principal investigator | Group (if more than 1 Group listed in the byline) and/or Subgroup (eg, Steering Committee) |
|-----------------------------------|------------|-----------------------|------------------|-------------------------------------------------------|------------------------------------------|---------------------------------------------------------|--------------------------------------------------------------------------------------------|
| Daisy                             | Duncan     |                       |                  | Chelsea and Westminster Hospital NHS Foundation Trust | London, UK                               | Research midwife                                        | BUMP Investigators                                                                         |
| Miriam                            | Bourke     |                       |                  | Chelsea and Westminster Hospital NHS Foundation Trust | London, UK                               | Research midwife                                        | BUMP Investigators                                                                         |
| Carmela                           | Martella   |                       |                  | Chelsea and Westminster Hospital NHS Foundation Trust | London, UK                               | Research midwife                                        | BUMP Investigators                                                                         |
| Jenny                             | Myers      |                       |                  | Manchester University NHS Foundation Trust            | Manchester, UK                           | Site Principle investigator                             | BUMP Investigators                                                                         |
| Natalie                           | Barry      |                       |                  | Manchester University NHS Foundation Trust            | Manchester, UK                           | Research midwife                                        | BUMP Investigators                                                                         |
| Heather                           | Glossop    |                       |                  | Manchester University NHS Foundation Trust            | Manchester, UK                           | Research midwife                                        | BUMP Investigators                                                                         |
| Kimberley                         | Farrant    |                       |                  | Manchester University NHS Foundation Trust            | Manchester, UK                           | Research midwife                                        | BUMP Investigators                                                                         |
| Clare                             | Waters     |                       |                  | Manchester University NHS Foundation Trust            | Manchester, UK                           | Research midwife                                        | BUMP Investigators                                                                         |
| Rehan                             | Khan       |                       |                  | Barts Health NHS Trust (Whipps Cross Hospital)        | London, UK                               | Site Principle investigator                             | BUMP Investigators                                                                         |
| Sujatha                           | Thamban    |                       |                  | Barts Health NHS Trust (Whipps Cross Hospital)        | London, UK                               | Research midwife                                        | BUMP Investigators                                                                         |
| Prudence                          | Jones      |                       |                  | Barts Health NHS Trust (Whipps Cross Hospital)        | London, UK                               | Research midwife                                        | BUMP Investigators                                                                         |
| Sophia                            | Felippe    |                       |                  | Barts Health NHS Trust (Whipps Cross Hospital)        | London, UK                               | Research midwife                                        | BUMP Investigators                                                                         |
| Zandile                           | Maseko     |                       |                  | Barts Health NHS Trust (Whipps Cross Hospital)        | London, UK                               | Research midwife                                        | BUMP Investigators                                                                         |
| Nick                              | Kametas    |                       |                  | Kings College Hospital NHS Foundation Trust           | London, UK                               | Site Principle investigator                             | BUMP Investigators                                                                         |
| Polly                             | Kay        |                       |                  | Kings College Hospital NHS Foundation Trust           | London, UK                               | Research midwife                                        | BUMP Investigators                                                                         |

## Supplemental Online Content: Nonauthor Collaborators

\*Indicates required information. Only first name, last name, and suffix will appear in PubMed.

| *First Name and Middle Initial(s) | *Last Name | *Suffix (eg, Jr, III) | Academic Degrees | Institution                                            | Location (city, state/province, country) | Role or Contribution, eg, chair, principal investigator | Group (if more than 1 Group listed in the byline) and/or Subgroup (eg, Steering Committee) |
|-----------------------------------|------------|-----------------------|------------------|--------------------------------------------------------|------------------------------------------|---------------------------------------------------------|--------------------------------------------------------------------------------------------|
| Katherine                         | Clark      |                       |                  | Kings College Hospital NHS Foundation Trust            | London, UK                               | Research midwife                                        | BUMP Investigators                                                                         |
| Rebecca                           | Jarman     |                       |                  | Kings College Hospital NHS Foundation Trust            | London, UK                               | Research midwife                                        | BUMP Investigators                                                                         |
| Olivia                            | Snowball   |                       |                  | Kings College Hospital NHS Foundation Trust            | London, UK                               | Research midwife                                        | BUMP Investigators                                                                         |
| Hayley                            | Martin     |                       |                  | Kings College Hospital NHS Foundation Trust            | London, UK                               | Research midwife                                        | BUMP Investigators                                                                         |
| Osaeloke                          | Osakwe     |                       |                  | West Middlesex University Hospital                     | London, UK                               | Site Principle investigator                             | BUMP Investigators                                                                         |
| Bernadette                        | Tilley     |                       |                  | West Middlesex University Hospital                     | London, UK                               | Research midwife                                        | BUMP Investigators                                                                         |
| Any                               | Barker     |                       |                  | West Middlesex University Hospital                     | London, UK                               | Research nurse                                          | BUMP Investigators                                                                         |
| Raquel                            | Gonzalez   |                       |                  | West Middlesex University Hospital                     | London, UK                               | Research midwife                                        | BUMP Investigators                                                                         |
| Asma                              | Khalil     |                       |                  | St. George's University Hospitals NHS Foundation Trust | London, UK                               | Site Principle Investigator                             | BUMP Investigators                                                                         |
| Sophie                            | Robinson   |                       |                  | St. George's University Hospitals NHS Foundation Trust | London, UK                               | Research Midwife                                        | BUMP Investigators                                                                         |
| Lisa                              | Canclini   |                       |                  | St. George's University Hospitals NHS Foundation Trust | London, UK                               | Research Midwife                                        | BUMP Investigators                                                                         |
| Rebecca                           | Unwin      |                       |                  | St. George's University Hospitals NHS Foundation Trust | London, UK                               | Research Midwife                                        | BUMP Investigators                                                                         |
| Katie                             | Morris     |                       |                  | Birmingham Women's and Children's NHS Foundation Trust | Birmingham, UK                           | Site Principle Investigator                             | BUMP Investigators                                                                         |
| Dianne                            | Mellers    |                       |                  | Birmingham Women's and Children's NHS Foundation Trust | Birmingham, UK                           | Research midwife                                        | BUMP Investigators                                                                         |

## Supplemental Online Content: Nonauthor Collaborators

\*Indicates required information. Only first name, last name, and suffix will appear in PubMed.

| *First Name and Middle Initial(s) | *Last Name     | *Suffix (eg, Jr, III) | Academic Degrees | Institution                                                      | Location (city, state/province, country) | Role or Contribution, eg, chair, principal investigator | Group (if more than 1 Group listed in the byline) and/or Subgroup (eg, Steering Committee) |
|-----------------------------------|----------------|-----------------------|------------------|------------------------------------------------------------------|------------------------------------------|---------------------------------------------------------|--------------------------------------------------------------------------------------------|
| Phern                             | Adams          |                       |                  | Birmingham Women's and Children's NHS Foundation Trust           | Birmingham, UK                           | Research midwife                                        | BUMP Investigators                                                                         |
| Lesley                            | Brittain       |                       |                  | Birmingham Women's and Children's NHS Foundation Trust           | Birmingham, UK                           | Research midwife                                        | BUMP Investigators                                                                         |
| Sohpie                            | Dann           |                       |                  | Birmingham Women's and Children's NHS Foundation Trust           | Birmingham, UK                           | Research midwife                                        | BUMP Investigators                                                                         |
| Chloe                             | O'Hara         |                       |                  | Birmingham Women's and Children's NHS Foundation Trust           | Birmingham, UK                           | Research midwife                                        | BUMP Investigators                                                                         |
| Diane                             | Whitehouse     |                       |                  | Birmingham Women's and Children's NHS Foundation Trust           | Birmingham, UK                           | Research midwife                                        | BUMP Investigators                                                                         |
| Bini                              | Ajay           |                       |                  | Croydon Health Services NHS Trust                                | London, UK                               | Site Principle investigator                             | BUMP Investigators                                                                         |
| Geraldine                         | Upson          |                       |                  | Croydon Health Services NHS Trust                                | London, UK                               | Research midwife                                        | BUMP Investigators                                                                         |
| Hannah                            | O'Donnell      |                       |                  | Croydon Health Services NHS Trust                                | London, UK                               | Research midwife                                        | BUMP Investigators                                                                         |
| Maria                             | Zammit-Mangion |                       |                  | Stoke Mandeville Hospital (Buckinghamshire Healthcare NHS Trust) | Buckinghamshire, UK                      | Site Principle investigator                             | BUMP Investigators                                                                         |
| Julie                             | Tebbutt        |                       |                  | Stoke Mandeville Hospital (Buckinghamshire Healthcare NHS Trust) | Buckinghamshire, UK                      | Research midwife                                        | BUMP Investigators                                                                         |
| Lisa                              | Frankland      |                       |                  | Stoke Mandeville Hospital (Buckinghamshire Healthcare NHS Trust) | Buckinghamshire, UK                      | Research midwife                                        | BUMP Investigators                                                                         |
| Danielle                          | Thornton       |                       |                  | Stoke Mandeville Hospital (Buckinghamshire Healthcare NHS Trust) | Buckinghamshire, UK                      | Research midwife                                        | BUMP Investigators                                                                         |
| Kristina                          | Sexton         |                       |                  | Kingston Hospital NHS Foundation Trust                           | London, UK                               | Site Principle investigator                             | BUMP Investigators                                                                         |

Supplemental Online Content: Nonauthor Collaborators

\*Indicates required information. Only first name, last name, and suffix will appear in PubMed.

| <b>*First Name and Middle Initial(s)</b> | <b>*Last Name</b> | <b>*Suffix (eg, Jr, III)</b> | Academic Degrees | Institution                            | Location (city, state/province, country) | Role or Contribution, eg, chair, principal investigator | Group (if more than 1 Group listed in the byline) and/or Subgroup (eg, Steering Committee) |
|------------------------------------------|-------------------|------------------------------|------------------|----------------------------------------|------------------------------------------|---------------------------------------------------------|--------------------------------------------------------------------------------------------|
| Rebecca                                  | Crowe             |                              |                  | Kingston Hospital NHS Foundation Trust | London, UK                               | Research Midwife                                        | BUMP Investigators                                                                         |
| Amy                                      | Bowers            |                              |                  | Kingston Hospital NHS Foundation Trust | London, UK                               | Research Midwife                                        | BUMP Investigators                                                                         |
| Joanne                                   | Winterbottom      |                              |                  | Kingston Hospital NHS Foundation Trust | London, UK                               | Research Midwife                                        | BUMP Investigators                                                                         |
