# Supplementary material
Source: PubMed Central journal article supplement (PMC9066279)
Supplement: jama-e224712-s005.pdf [file jama-e224712-s005.pdf]

## Data Sharing Statement

Tucker. Effect of Self-monitoring of Blood Pressure on Diagnosis of Hypertension During Higher-Risk Pregnancy. *JAMA*. Published May 03, 2022. doi:10.1001/jama.2022.4712

### Data

**Data available:** Yes

**Data types:** Deidentified participant data

**How to access data:** Data are available from the authors upon reasonable request and with permission of the University of Oxford. Use of data will require approval by an independent review committee identified for this purpose and investigators requesting data will need to provide a written protocol including analysis plan and sign a data sharing/access agreement. Requests for Data Sharing should be directed to [information.guardian@phc.ox.ac.uk](mailto:information.guardian@phc.ox.ac.uk).

**When available:** beginning date: 05-31-2023

### Supporting Documents

**Document types:** None

### Additional Information

**Who can access the data:** Data are available from the authors upon reasonable request and with permission of the University of Oxford. Use of data will require approval by an independent review committee identified for this purpose and investigators requesting data will need to provide a written protocol including analysis plan and sign a data sharing/access agreement.

**Types of analyses:** Analyses with a written pre-specified protocol

**Mechanisms of data availability:** Use of data will require approval by an independent review committee identified for this purpose and investigators requesting data will need to provide a written protocol including analysis plan and sign a data sharing/access agreement.

**Any additional restrictions:** Requests for Data Sharing should be directed to [information.guardian@phc.ox.ac.uk](mailto:information.guardian@phc.ox.ac.uk).
